# Supplementary material for: Myocardial Area at Risk and Salvage in reperfused acute MI Measured by Texture Analysis of Cardiac T2 Mapping and Its Prediction Value of Functional Recovery in the Convalescent Stage
Source: Research Square preprint supplement (doi:10.21203/rs.3.rs-218147/v1), 2021-02-12
Supplement: Supplementary file 1 [file 62c63c7d1d540e5a6be8dc78.docx]

Online Appendix Fig.1 legends

In the order from (a) to (c) the images were from: ROC curve between infarcted myocardium and salvageable myocardium of each texture feature (including T2 mean) from a): all patients; b): patients without MVO; c): patients with MVO
